# Supplementary material for: Absent or insufficient anti-SARS-CoV-2 S antibodies at ICU admission are associated to higher viral loads in plasma, antigenemia and mortality in COVID-19 patients
Source: bioRxiv or medRxiv preprint supplement (doi:10.1101/2021.03.08.21253121), 2021-03-08
Supplement: Supplementary file [file media-1.pdf]

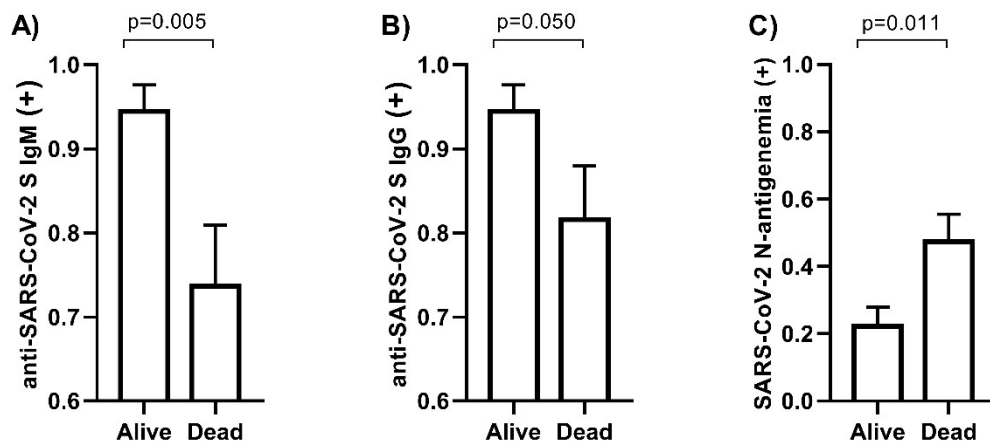

**Supplementary File 1. Frequencies of patients with positive SARS-CoV-2 S antibodies (IgM, IgG) and antigenemia by survival status 30 days following ICU admission**

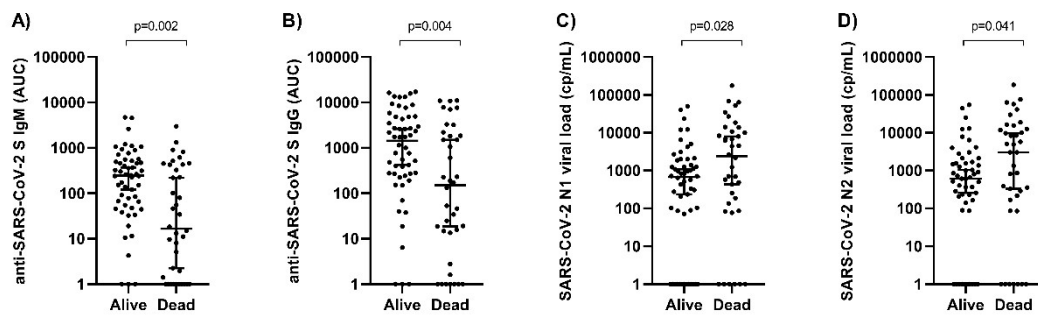

**Supplementary File 2. Levels of SARS-CoV-2 S antibodies (IgM, IgG) and viral RNA load (N1, N2) in plasma following ICU admission by survival status at day 30**
